# Supplementary material for: Effectiveness of implementing a best practice primary healthcare model for low back pain (BetterBack) compared with current routine care in the Swedish context: an internal pilot study informed protocol for an effectiveness-implementation hybrid type 2 trial
Source: PubMed Central journal article supplement — BMJ Open. 2018 Apr 24;8(4):e019906. doi: 10.1136/bmjopen-2017-019906 (PMC5922514; doi:10.1136/bmjopen-2017-019906), 2018-04-24
Supplement: bmjopen-2017-019906supp004.pdf [file bmjopen-2017-019906supp004.pdf]

*Summary of the workshop to provide training in the use of the BetterBack<sup>©</sup> model of care.*

| Schedule             | Content       |                                                                               | Brief description                                                                                                                                                                                                               | Learning objectives                                                                                                                                              | BCTs used                                                                                                                     |
|----------------------|---------------|-------------------------------------------------------------------------------|---------------------------------------------------------------------------------------------------------------------------------------------------------------------------------------------------------------------------------|------------------------------------------------------------------------------------------------------------------------------------------------------------------|-------------------------------------------------------------------------------------------------------------------------------|
| Day 1<br>08:15-08:30 | Presentation  |                                                                               | Welcome and introduction                                                                                                                                                                                                        |                                                                                                                                                                  |                                                                                                                               |
| Day 1<br>08:30-08:50 | Questionnaire | Participating physiotherapists record background information, PABQ, PCQ, DIBQ | Participants receive 20 minutes to complete the questionnaire                                                                                                                                                                   | To generate descriptions recorded by physiotherapists before and after BetterBack <sup>©</sup> model of care                                                     |                                                                                                                               |
| Day 1<br>08:50-09:40 | Presentation  | LBP clinical guidelines                                                       | Present evidence based guideline recommendations and the development process behind the recommendations                                                                                                                         | To understand current evidence based recommendations for primary care of LBP and stakeholder involvement in their development                                    | - Instruction on how to perform the behavior<br>- Credible source<br>- Information about other's approval                     |
| Day 1<br>09:40-10:00 | Presentation  | Background to BetterBack <sup>©</sup> model of care                           | Outlines the goals for the day, defines and conceptualizes the BetterBack <sup>©</sup> model of care and communicates need for the model of care                                                                                | To understand aims, objectives and learning outcomes for the practitioner education                                                                              | - Credible source<br>- Social reward<br>- Pros and cons<br>- Comparative imagining of future outcomes                         |
| Day 1<br>10:00-10:20 | Swedish fika  | Reflection                                                                    | Informal discussion about aims of the BetterBack <sup>©</sup> model of care compared to current practice                                                                                                                        | To evaluate the practical aims of the BetterBack <sup>©</sup> model                                                                                              | - Social support                                                                                                              |
| Day 1<br>10:20-11:40 | Demonstration | Use of implementation tools                                                   | Demonstration of how evidence based recommendations can be practically applied in the BetterBack <sup>©</sup> model of care                                                                                                     | To understand how to practically use implementation tools to assist clinical reasoning for matching assessment findings with appropriate diagnosis and treatment | - Instruction on how to perform the behaviour<br>- Demonstration of behaviour<br>- Problem-solving<br>- Feedback on behaviour |
| Day 1<br>11:45-12:00 | Reflection    | Use of implementation tools                                                   | In pairs, participants discuss reflections upon how they can practically apply the implementation tools into their clinical practice                                                                                            | To evaluate the practical use of the BetterBack <sup>©</sup> model clinical reasoning tools                                                                      | - Behavioural practice/rehearsal<br>- Framing/reframing                                                                       |
| Day 1<br>12:00-13:00 | Lunch break   |                                                                               |                                                                                                                                                                                                                                 |                                                                                                                                                                  |                                                                                                                               |
| Day 1<br>13:00-14:30 | Task          | Use of implementation tools                                                   | Participants are divided into 3 work groups who each transition between 3x30min patient scenario workstations. Participants practice the application of the BetterBack <sup>©</sup> model implementation tools using therapist- | To develop practical skills in the use of the BetterBack <sup>©</sup> model clinical reasoning tools                                                             | - Behavioural practice/rehearsal<br>- Feedback on behaviour<br>- Social support                                               |

|                      |                    |                                         |                                                                                                                                                                                                                                                                                        |                                                                                                                                           |                                                                                                                                                                         |
|----------------------|--------------------|-----------------------------------------|----------------------------------------------------------------------------------------------------------------------------------------------------------------------------------------------------------------------------------------------------------------------------------------|-------------------------------------------------------------------------------------------------------------------------------------------|-------------------------------------------------------------------------------------------------------------------------------------------------------------------------|
|                      |                    |                                         | patient role-play. Feedback is provided from the tutor and between peers                                                                                                                                                                                                               |                                                                                                                                           |                                                                                                                                                                         |
| Day 1<br>14:30-15:00 | Task               | Feedback on work with patient scenarios | Each group discuss and give feedback on their work with the first patient scenario station (10min per group)                                                                                                                                                                           | To learn how peers used BetterBack© model clinical reasoning tools                                                                        | - Graded task<br>- Verbal persuasion about capability                                                                                                                   |
| Day 1<br>15:00-15:20 | Swedish fika       | Reflection                              | Informal discussion about the practical use of the BetterBack© model of care compared to current practice                                                                                                                                                                              | To evaluate the practical use of the BetterBack© model clinical reasoning tools                                                           | - Social support                                                                                                                                                        |
| Day 1<br>15:20-15:40 | Summary of the day | Question and answer session and close   | Learning outcomes are summarised                                                                                                                                                                                                                                                       |                                                                                                                                           | - Feedback on behaviour                                                                                                                                                 |
| Day 2<br>08:15-08:30 | Discussion         |                                         | Reflections after the first day of the workshop                                                                                                                                                                                                                                        |                                                                                                                                           |                                                                                                                                                                         |
| Day 2<br>08:30-09:00 | Presentation       |                                         | Benefits of using the implementation tools for assessment, diagnosis and intervention                                                                                                                                                                                                  | To appreciate how to practically use implementation tools to assist clinical reasoning for aligning assessment, diagnostics and treatment | - Instruction on how to perform the behaviour<br>- Information about social and environmental Consequences<br>- Credible source<br>- Information about other's approval |
| Day 2<br>09:00-09:20 | Demonstration      | BetterBack© model treatment tools       | Patient education (brochure)                                                                                                                                                                                                                                                           | To understand how to use the implementation tools for LBP patient education                                                               | - Instruction on how to perform the behaviour                                                                                                                           |
| Day 2<br>09:20-10:00 | Demonstration      | BetterBack© model treatment tools       | Group education                                                                                                                                                                                                                                                                        | To understand how to use the implementation tools for LBP patient education                                                               | - Instruction on how to perform the behaviour                                                                                                                           |
| Day 2<br>10:00-10:20 | Swedish fika       | Reflection                              | Informal discussion about which patients group education is relevant                                                                                                                                                                                                                   | To reflect on the practical use of the BetterBack© model                                                                                  | - Social support                                                                                                                                                        |
| Day 2<br>10:20-11:00 | Demonstration      | BetterBack© model treatment tools       | Exercise program                                                                                                                                                                                                                                                                       | To understand how to use the implementation tools for an exercise program for LBP                                                         | - Instruction on how to perform the behaviour                                                                                                                           |
| Day 2<br>11:00-12:00 | Task               | Use of implementation tools             | Participants are divided into 3 work groups who each transition between 3x30min patient scenario workstations. Participants practice the application of the BetterBack© model treatment tools using therapist-patient role-play. Feedback is provided from the tutor and between peers | To develop practical skills in the use of the BetterBack© model treatment tools                                                           | - Behavioural practice/rehearsal<br>- Feedback on behaviour<br>- Social support                                                                                         |

|                      |                |                                                                                        |                                                                                                                                                                                                                                                                                                     |                                                                                                               |                                                                                 |
|----------------------|----------------|----------------------------------------------------------------------------------------|-----------------------------------------------------------------------------------------------------------------------------------------------------------------------------------------------------------------------------------------------------------------------------------------------------|---------------------------------------------------------------------------------------------------------------|---------------------------------------------------------------------------------|
| Day 2<br>12:00-13:00 | Lunch break    |                                                                                        |                                                                                                                                                                                                                                                                                                     |                                                                                                               |                                                                                 |
| Day 2<br>13:00-13:30 | Task continued | Use of implementation tools                                                            | Participants are divided into 3 work groups who each transition between 3x30min patient scenario workstations. Participants practice the application of the BetterBack <sup>SM</sup> model treatment tools using therapist-patient role-play. Feedback is provided from the tutor and between peers | To develop practical skills in the use of the BetterBack <sup>SM</sup> model treatment tools                  | - Behavioural practice/rehearsal<br>- Feedback on behaviour<br>- Social support |
| Day 2<br>13:30-14:00 | Task           | Feedback on work with patient scenarios                                                | Each group discuss and give feedback on their work with the first patient scenario station (10min per group)                                                                                                                                                                                        | To develop practical skills in the use of the BetterBack <sup>SM</sup> model treatment tools                  | - Graded task<br>- Verbal persuasion about capability                           |
| Day 2<br>14:00-14:30 | Demonstration  | BetterBack <sup>SM</sup> model of care website                                         | Display of to navigate the BetterBack <sup>SM</sup> model of care website                                                                                                                                                                                                                           | To understand how to use the BetterBack <sup>SM</sup> model of care website                                   | - Instruction on how to perform the behaviour                                   |
| Day 2<br>14:30-15:00 | Task           | Potential future outcomes of the BetterBack <sup>SM</sup> model of care implementation | Participants write on post-it notes the most important future outcomes of the BetterBack <sup>SM</sup> model of care implementation based on:<br>1. A professional perspective<br>2. A patient perspective                                                                                          | To appreciate the potential outcomes of the BetterBack <sup>SM</sup> model of care                            | - Comparative imagining of future outcomes                                      |
| Day 2<br>15:00-15:30 | Presentation   |                                                                                        | Clinical champion presents an administrative action plan (designed earlier in consensus with clinical colleagues) for the implementation of the BetterBack <sup>SM</sup> model of care at their clinic                                                                                              | To reflect on the practical use of the BetterBack <sup>SM</sup> model of care website                         | - Action planning                                                               |
| Day 2<br>15:30-15:50 | Questionnaire  | Participating physiotherapists record background information, PABQ, PCQ, DIBQ          | Participants receive 20 minutes to complete the questionnaire                                                                                                                                                                                                                                       | To generate descriptions recorded by physiotherapists before and after BetterBack <sup>SM</sup> model of care |                                                                                 |
| Day 2<br>15:50-16:00 | Diploma        |                                                                                        | Participants completing the workshop receive a CME diploma                                                                                                                                                                                                                                          |                                                                                                               | - Incentive                                                                     |
